# Supplementary material for: Phototransduction in Anuran Green Rods: Origins of Extra-Sensitivity
Source: Int J Mol Sci. 2021 Dec 13;22(24):13400. doi: 10.3390/ijms222413400 (PMC8707487; doi:10.3390/ijms222413400)
Supplement: Supplementary file 1 [file ijms-22-13400-s001.zip › File S1.xlsx]

## Sheet: Statistical analysis 
Activation rate relative to average for red rods								Turn-off time constant, s								Activation rate relative to average for red rods
	Frog red rods (n=8)	Frog green rods (n=10)		Toad red rods (n=6)	Toad green rods (n=8)				Frog red rods (n=8)	Frog green rods (n=10)		Toad red rods (n=6)	Toad green rods (n=9)				Frog red rods (n=8)	Frog green rods (n=12)		Toad red rods (n=11)	Toad green rods (n=8)
	1.02669	0.83612		0.773994	1.19474				0.396	1.025		1.389	2.812				15.904	16.099		12.587	9.678
	0.445434	0.454959		1.28866	1.56495				0.756	1.172		1.241	2.813				12.141	31.735		13.328	10.789
	0.462107	1.00604		0.535045	0.930233				1.074	1.717		0.828	3.056				12.65	15.202		14.617	19.943
	0.875657	0.465766		0.439754	1.26743				1.225	0.785		1.196	1.444				12.244	30.127		15.626	23.505
	1.41243	1.08578		1.21654	1.88324				0.431	0.938		0.473	1.435				9.232	22.38		7.552	10.283
	1.34771	0.960615		1.60514	1.23305				1.096	1.69		0.485	2.857				15.031	13.247		12.247	9.972
	1.30039	0.579374			1.04493				1.15	1.362			2.064				13.57	15.359		11.328	13.431
	1.30039	1.43267			1.87266				0.961	1.906			2.015				15.104	11.151		13.732	11.546
		2								0.959			2.032					20.613		15.105
		1.42857								1.186								10.585		10.07
																		23.038		11.925
																		16.319
Shapiro-Wilk test								Shapiro-Wilk test								Shapiro-Wilk test
W	0.8439	0.9323		0.9307	0.8975			W	0.8613	0.9219		0.8739	0.8745			W	0.9356	0.9072		0.9541	0.7723
P value	0.0825	0.4706		0.5858	0.2741			P value	0.1236	0.3728		0.2422	0.1373			P value	0.5682	0.1963		0.6966	0.0144
Unpaired t test with Welch's correction								Unpaired t test with Welch's correction								Unpaired t test with Welch's correction
P value	0.9863			0.1149				P value	0.0331 *			0.0002 *				P value	0.0203 *			0.595
Welch-corrected t, df	t=0.01748, df=16.00			t=1.741, df=9.224				Welch-corrected t, df	t=2.333, df=15.91			t=5.105, df=13.00				Welch-corrected t, df	t=2.617, df=13.98			t=0.5508, df=9.091
95% confidence interval	-0.4375 to 0.4448			-0.1171 to 0.9119				95% confidence interval	0.03532 to 0.7404			0.7761 to 1.915				95% confidence interval	1.008 to 10.17			-3.371 to 5.546
